# Supplementary material for: Design strategies of surface basicity for NO oxidation over a novel Sn–Co–O catalyst in the presence of H2O
Source: Royal Society of Chemistry journal article supplement (doi:10.1039/c7cy00174f), 2017-01-01
Supplement: c7cy00174f1.pdf [file c7cy00174f1.pdf]

# Design strategies of surface basicity for NO oxidation over novel Sn-Co-O catalyst in the presence of H<sub>2</sub>O

Huazhen Chang<sup>a\*</sup>, Mingguan Li<sup>a,b,c</sup>, Zhenguo Li<sup>b</sup>, Lei Duan<sup>b</sup>, Chaocheng Zhao<sup>c\*</sup>, Junhua Li<sup>b\*</sup>, and  
Jiming Hao<sup>b</sup>

<sup>a</sup> School of Environment and Natural Resources, Renmin University of China, Beijing 100872, China

<sup>b</sup> State Key Joint Laboratory of Environment Simulation and Pollution Control (SKLESPC), School of  
Environment, Tsinghua University, Beijing 100084, China

<sup>c</sup> College of Chemical Engineering, China University of Petroleum, Qingdao 266580, China

## Electronic Supplementary Information

---

\* Corresponding author. Tel.: +86-10-62512572; +86-532-86981719; +86-10-62771093;  
E-mail address: chz@ruc.edu.cn (H. Chang); zhaoch@upc.edu.cn (C. Zhao); lijunhua@tsinghua.edu.cn (J. Li).

## 1. Catalyst characterization

In this study, the powder X-ray diffraction (XRD) patterns were characterized on a Rigaku D/max-2500 diffractometer. The H<sub>2</sub>-TPR was characterized by a Micromeritics ChemiSorb 2720 device. The sample (~50mg) was preheated in a N<sub>2</sub> flow at 350°C for 60min, then it was heated in a 10 % H<sub>2</sub>/He flow to make the temperature increased linearly from 50 to 1000 °C at a heating rate of 10 Cmin<sup>-1</sup>. The depleted amount of H<sub>2</sub> was evaluated by the signal of a thermal conductivity detector. NO+O<sub>2</sub>-TPD (temperature-programmed desorption) experiment consisted of three steps: (1) sweep of the sample in N<sub>2</sub> at 350 °C for 1 h; (2) adsorption of NO for about 1 h by passing a gas mixture containing 500 ppm NO + 5% O<sub>2</sub> with N<sub>2</sub> as balance gas and the total flow rate was 200 ml/min through the reactor at 100 °C; (3) TPD measurements were carried out up to 600 °C at a heating rate of 10 °C /min with the total flow rate of 200 ml/min N<sub>2</sub>. The in-situ DRIFTS experiments were conducted on a Nicolet 6700 FTIR spectrophotometer and a liquid nitrogen-cooled MCT detector. Prior to each experiment, the sample was pretreated in N<sub>2</sub> flow at 400 °C for 1 h to remove the impurities. After decreasing temperature to 30 °C, the samples were exposed to a NO + O<sub>2</sub> steam for 30 min and a N<sub>2</sub> flow for 10 min to remove the weakly adsorbed NO<sub>x</sub>, then the spectra were collected after heating to each desired temperature.

## 2. CO<sub>2</sub>-TPD

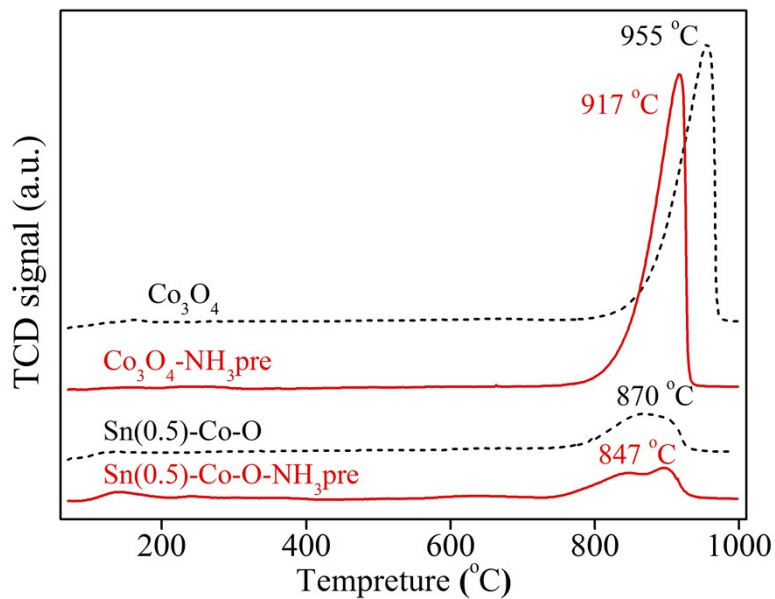

Fig. S1. CO<sub>2</sub>-TPD spectra of Sn(0.5)-Co-O and Co<sub>3</sub>O<sub>4</sub> catalysts prepared by different precipitants.

### 3. NO oxidation performance

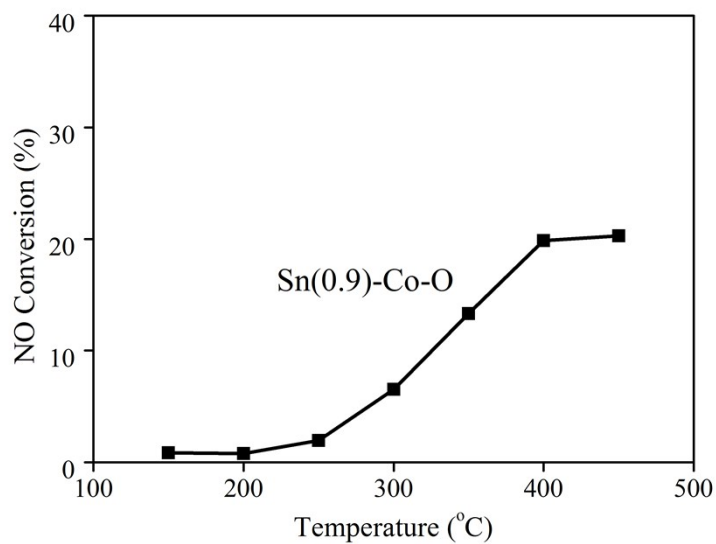

Fig.S2 NO conversion over Sn(0.9)-Co-O catalyst. Reaction conditions: 0.15 g samples, 500 ppm NO, 10 % O<sub>2</sub>, N<sub>2</sub> balance, GHSV=3.5×10<sup>4</sup> h<sup>-1</sup>.

The Co<sub>3</sub>O<sub>4</sub> catalyst showed good NO oxidation activity in a wide temperature range of 250-

300 °C and the best performance was obtained at 300 °C. After addition of Sn, the NO oxidation efficiency was not affected obviously comparing with  $\text{Co}_3\text{O}_4$ , until the ratio of Sn/(Sn+Co) reached to 0.5. Nevertheless. Meanwhile, the  $\text{SnO}_2$  catalyst exhibited nearly no activity in NO oxidation. As reported in literature, the NO oxidation reaction becomes thermodynamic controlled at high temperatures<sup>1,2</sup>. The activity decreased as the temperature increasing over all of catalyts at >300 °C.

#### 4. XRD analysis

The crystal structure of Sn-Co-O mixed metal oxides catalyts was determined by XRD and the diffraction patterns are shown in Figure S2. For  $\text{Co}_3\text{O}_4$  catalyst, it could be observed that sharp diffraction peaks appeared which could be attributed to  $\text{Co}_3\text{O}_4$ . For Sn(0.25)-Co-O and Sn(0.5)-Co-O catalyts, besides the peaks attributed to  $\text{Co}_3\text{O}_4$ , new peaks correspond to rutile  $\text{SnO}_2$  of a tetragonal structure were presented. It indicated that two different crystal structure were formed in these binary metal oxides catalyts.

#### 5. Redox ability

The  $\text{H}_2$ -TPR spectra of  $\text{SnO}_2$ , Sn-Co-O and  $\text{Co}_3\text{O}_4$  catalyts are shown in Fig. S2. The  $\text{Co}_3\text{O}_4$  catalyst displayed two reduction peaks at 320°C and 400°C. According to the results of XRD diffraction, only  $\text{Co}_3\text{O}_4$  exists in  $\text{Co}_3\text{O}_4$  catalyst. Therefore, the reduction peak at 320°C can be attributed to the reduction of the catalyst  $\text{Co}_2\text{O}_3$  to CoO and reduction peak at 400°C could be assigned to CoO to cobalt in  $\text{Co}_3\text{O}_4$ . This is consistent with the two-step reduction process reported in the literature<sup>3</sup>. Pure  $\text{SnO}_2$  catalyst displayed a overlapping reduction peaks at 480 ~

760 °C, the peak may be attributed to the reduction of SnO<sub>2</sub> to SnO, then to tin<sup>4,5</sup>.

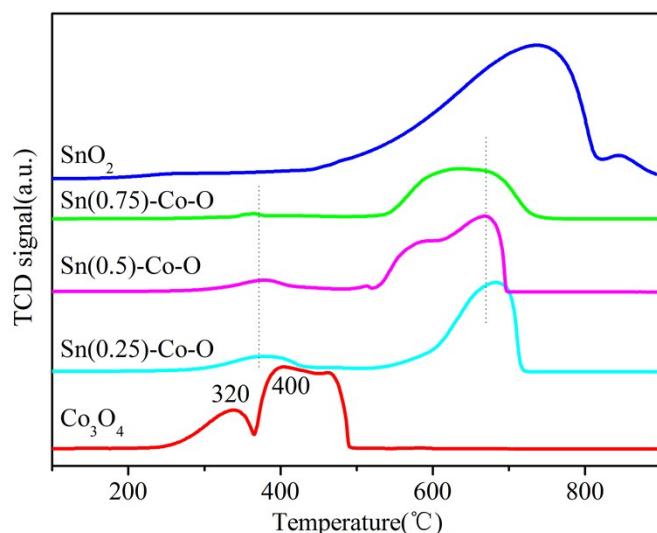

Fig. S3. H<sub>2</sub>-TPR spectra of SnO<sub>2</sub>, Sn-Co-O , and Co<sub>3</sub>O<sub>4</sub> catalysts.

With regard to Sn-Co-O catalysts, there were two overlapping reduction peaks in low temperature range (300°C-400°C) and high temperature range (500°C-700°C) respectively. The low temperature range peak can be attributed to the reduction of Co<sub>3</sub>O<sub>4</sub> and the peak at high temperature range reduction could be ascribed to the reduction of SnO<sub>x</sub>. Compared with pure Co<sub>3</sub>O<sub>4</sub> catalyst, the reduction peak of Sn-Co-O at low-temperature range shift to high temperature and became weaker with increasing Sn content, indicating that doping of Sn affected the redox property of Co<sub>3</sub>O<sub>4</sub><sup>6</sup>. Comparatively, the peak attributing to reduction of SnO<sub>2</sub> shifted to lower temperature on Sn-Co-O catalyst than that on SnO<sub>2</sub>, indicating the redox property was enhanced on these sample. On the other hand, superior NO oxidation activity was obtained over the Sn(0.75)-Co-O catalyst, indicating that excellent redox property might be not essential in NO oxidation. The NO adsorption behavior is also important in NO oxidation over Sn-Co-O catalysts.

## 6. In-situ DRIFTS study

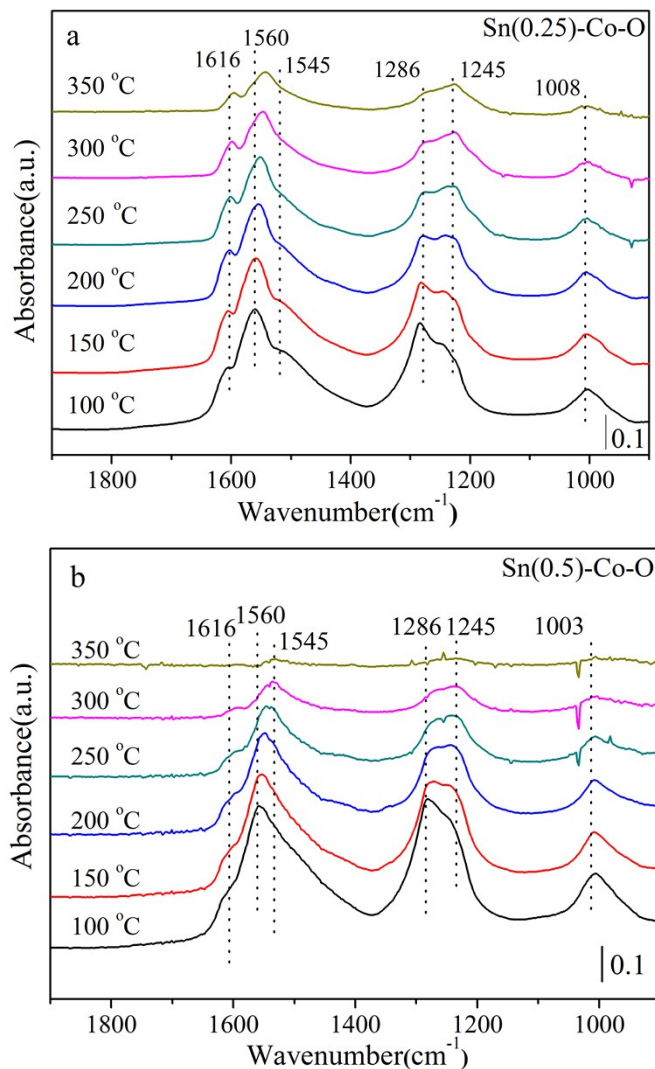

Fig. S4. In-situ DRIFTS spectra of Sn(0.25)-Co-O (a) and Sn(0.5)-Co-O (b) after NO+O<sub>2</sub> adsorption.

According to previous studies, the peaks attributed to bridged bidentate nitrates (at 1616 cm<sup>-1</sup>), monodentate nitrates (at 1560 cm<sup>-1</sup> and 1545 cm<sup>-1</sup>), bridging nitrates (at 1003-1008 cm<sup>-1</sup>), and nitrite species (at 1286 cm<sup>-1</sup>) could be found over two catalysts.<sup>7-9</sup> The peaks appeared at 1245-1270 cm<sup>-1</sup> could be attributed to nitrites/ HONO species.<sup>10, 11</sup> Raising the temperature from 100 to 350 °C, the intensity of nitrites decreased rapidly, while nitrates species decreased

continuously and was totally eliminated at 350 °C over Sn(0.5)-Co-O catalyst.

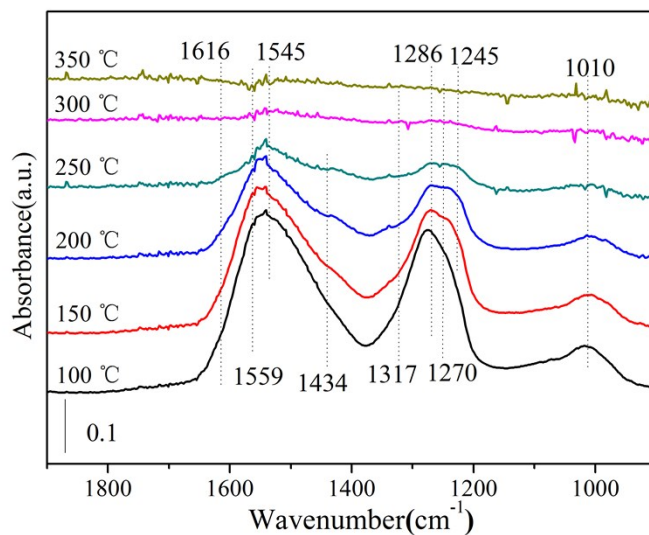

Fig. S5. In-situ DRIFTS spectra of Sn(0.75)-Co-O after NO adsorption.

## 7. NO oxidation stability test

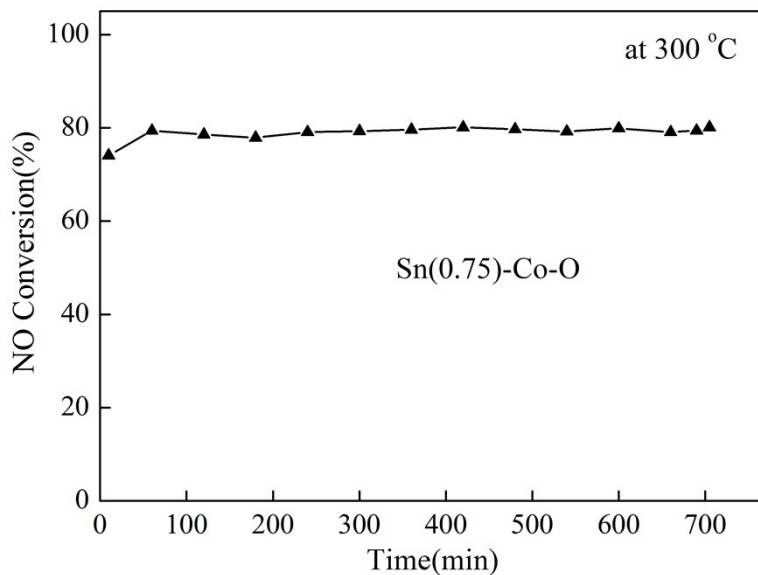

Fig. S6 Stability test of NO oxidation performance over Sn(0.75)-Co-O catalyst.

The NO oxidation stability test with a period of 720 min over Sn(0.75)-Co-O was performed

and the results are shown in Fig. S6. It could be seen the catalytic activity was stable within the test period.

## REFERENCES

- 1 P. S. Metkar, V. Balakotaiah and M. P. Harold, *Catalysis Today*, 2012, **184**, 115-128.
- 2 C. H. Kim, G. Qi, K. Dahlberg and W. Li, *Science*, 2010, **327**, 1624-1627.
- 3 Y. Yu, L. Zhong, J. Ding, W. Cai and Q. Zhong, *RSC Advances*, 2015, **5**, 23193-23201.
- 4 X. Yao, Y. Xiong, W. Zou, L. Zhang, S. Wu, X. Dong, F. Gao, Y. Deng, C. Tang and Z. Chen, *Applied Catalysis B: Environmental*, 2014, **144**, 152-165.
- 5 X. Yao, C. Tang, Z. Ji, Y. Dai, Y. Cao, F. Gao, L. Dong and Y. Chen, *Catalysis Science & Technology*, 2013, **3**, 688-698.
- 6 L. Wei, J. Li and X. Tang, *Catalysis letters*, 2009, **127**, 107-112.
- 7 X. Yao, Y. Xiong, W. Zou, L. Zhang, S. Wu, X. Dong, F. Gao, Y. Deng, C. Tang, Z. Chen, L. Dong and Y. Chen, *Applied Catalysis B-Environmental*, 2014, **144**, 152-165.
- 8 M. Kantcheva, *Journal of Catalysis*, 2001, **204**, 479-494.
- 9 B. Tsyntsarski, V. Avreyska, H. Kolev, T. Marinova, D. Klissurski and K. Hadjiivanov, *Journal of Molecular Catalysis a-Chemical*, 2003, **193**, 139-149.
- 10 L. Wei, J. Li and X. Tang, *Catal. Lett.*, 2009, **127**, 107-112.
- 11 M. P. Ruggeri, T. Sella, M. Colombo, I. Nova and E. Tronconi, *Journal of Catalysis*, 2014, **311**, 266-270.
